# Supplementary material
Source: Research Square preprint supplement (doi:10.21203/rs.3.rs-10005453/v1)
Supplement: Supplementary file 1 [file 6755091d66489dd0ce15b583.docx]

**Title of study: Prevalence of Sarcopenia Risk and Its Associations with Physical Performance, Mental Health, Lifestyle Behaviors, Nutritional Status, and Short-Bout of Physical Activity Among Community Dwelling Older Adults in the UAE: A Cross-Sectional Study**

**Questionnaire**

This study is a cross-sectional assessment of sarcopenia risk and its associated factors among older adults. Data were collected using a structured questionnaire covering socio-demographic characteristics, physical performance, lifestyle behaviors, nutritional status, cognitive function, depressive symptoms, short-bout physical activity, and sarcopenia risk. Validated assessment tools were used for key measurements, including the Short Physical Performance Battery (SPPB) for physical performance, the SARC-F and calf circumference for sarcopenia risk assessment, the Geriatric Depression Scale (GDS-15) for depressive symptoms, the 6-Item Cognitive Impairment Test (6CIT) for cognitive function, and the Mini Nutritional Assessment Short Form (MNA-SF) for nutritional status. Short-bout physical activity was assessed using a newly developed questionnaire. All responses and measurements were kept confidential and used solely for research purposes. Participation was voluntary, and participants could withdraw from the study at any time without penalty.

Date

**Study ID (001, 002...)**

**Study explained**

*Mark only one oval.*


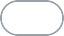
 Yes

**Signed consent obtained**

*Mark only one oval.*


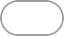
 Yes

**Demographic Information**

**Gender**

*Mark only one oval.*


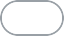
 Male
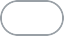
 Female

**Age in years**

**Height in Meters**

**Weight in kilograms**

**Dominant hand**

*Mark only one oval.*


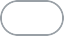
 Right Hand
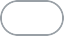
 Left Hand

**Educational Qualification**

*Mark only one oval.*

- Primary school (Class 1 to Class 5)
- Middle school (Class 6 to Class 8)
- High school (Class 9 to Class 10)
- Higher secondary school (Class 11 to Class 12)
- Undergraduate
- Post-graduate

**Employment status**

*Mark only one oval.*

- Never worked
- Currently not working
- Working
- Retired

**Marital Status**

*Mark only one oval.*

- Never Married
- Married
- Separated
- Divorced
- Widow or widower

**Current living arrangement**

*Mark only one oval.*

- Living alone
- Living with partner
- Living with relatives
- Living with spouse

**Number of household members (including the participant)**

**Peak Expiratory Flow (PEF) – Pulmonary function**

**Instructions:**
Take a deep breath and blow forcefully into the peak flow meter. Three attempts will be recorded, and the highest value will be used for analysis.

**Recording Attempts (L/min)**

- <200 L/min
- 200–299 L/min
- 300–399 L/min
- ≥400 L/min

**Cognitive assessment**

**Six-Item Cognitive Impairment Test (6CIT)**

Explain to the participant: I will ask a few questions to understand your memory and thinking. Please answer

as best as you can. Read all questions aloud, record answers in the form. Allow **pauses**, do not prompt answers.

**Ask participant what year is that?** *

If told correctly, choose 0. If incorrect, choose 4.

*Mark only one oval.*


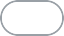
 0


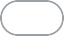
 4

**Ask participant what month is that?** *

If told correctly, choose 0. If incorrect, choose 3.

*Mark only one oval.*


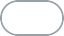
 0


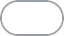
 3

**Give the patient an address phrase to remember with 5 components (*you can use the example below*).**

**Example:** Prabu, Ilango, 42, Perumal Street.

**Ask participant to say the current time (within one hour)?**

If told correctly, choose 0. If incorrect, choose 3.

*Mark only one oval.*


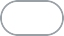
 0


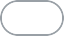
 3

**Ask participant to count backwards from 20 to 1.** *

If told correctly, choose 0. If there was 1 error, choose 2. If there was more than 1 error, choose 4.

- 0
- 2
- 4

**Ask participant to say the months of the year in reverse (Arabic or English calendar months are fine)**

If told correctly, choose 0. If there was 1 error, choose 2. If there was more than 1 error, choose 4.

- *0*
- *2*
- *4*

**Ask participant to repeat the address phrase told a few minutes ago ?**

If told correctly, choose 0. If there was 1 error, choose 2. If there were 2 errors, choose 4. If there are 3 errors, choose 6. If there are 4 errors, choose 8. All wrong, choose 10.

*Mark only one oval.*

- 0
- 2
- 4
- 6
- 8
- 10

**Score interpretation**

0–7 = Normal cognition

8–9 = Mild cognitive impairment

10–28 = Significant cognitive impairment

**Reference**

Brooke P, Bullock R. Validation of a 6-item cognitive impairment test with a view to primary care usage. Int J Geriatr Psychiatry. 1999;14(11):936-40.

**Geriatric Depression Scale (15)**

**Instructions**: Choose the best answer for how you felt over the past week.

Are you basically satisfied with your life?

*Mark only one oval.*


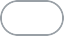
 Yes
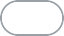
 No

Have you dropped many of your activities and interests?

*Mark only one oval.*


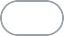
 Yes
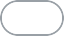
 No

Do you feel that your life is empty?

*Mark only one oval.*


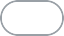
 Yes
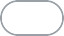
 No

Do you often get bored?

*Mark only one oval.*


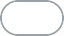
 Yes
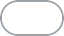
 No

Are you in good spirits most of the time?

*Mark only one oval.*


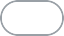
 Yes
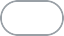
 No

Are you afraid that something bad is going to happen to you?

*Mark only one oval.*


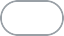
 Yes
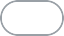
 No

Do you feel happy most of the time?

*Mark only one oval.*


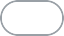
 Yes
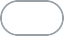
 No

Do you often feel helpless?

*Mark only one oval.*


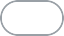
 Yes
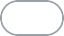
 No

Do you prefer to stay at home, rather than going out and doing new things?

*Mark only one oval.*


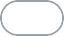
 Yes
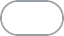
 No

Do you feel you have more problems with memory than most people?

*Mark only one oval.*


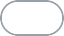
 Yes
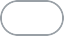
 No

Do you think it is wonderful to be alive?

*Mark only one oval.*


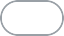
 Yes
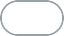
 No

Do you feel pretty worthless the way you are now?

*Mark only one oval.*


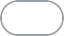
 Yes
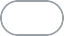
 No

Do you feel full of energy?

*Mark only one oval.*


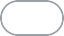
 Yes
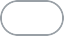
 No

Do you feel that your situation is hopeless?

*Mark only one oval.*


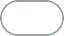
 Yes
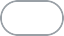
 No

Do you think that most people are better off than you are?

*Mark only one oval.*

Yes
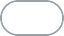
 No


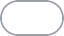


**Scoring:**

Each item is scored **1 point** for a depressive response. Total score ranges from **0 to 15**.

**Interpretation of Total Score:**

0 – 4 Normal / No depression

5 – 8 Mild depressions

9 – 11 Moderate depression

12 – 15 Severe depressions

**Reference**

Greenberg SA. The Geriatric Depression Scale (GDS): Short Form. *Try This: General Assessment Series, Issue No. 4*. New York: Hartford Institute for Geriatric Nursing, New York University, Rory Meyers College of Nursing; 2019.

**Older Adult Lifestyle Scale (OALS – 19 Items)**

**Instructions for Participants:**

Please read each statement carefully and select the option that best describes how often you engage in the following activities. *(1 = Never, 2 = Rarely, 3 = Sometimes, 4 = Often, 5 = Always)*

**Section 1: Preventive behaviors**

**Do you care about preventing diseases such as diabetes, high blood pressure, obesity among others?**

*Mark only one oval.*


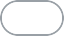
 Never
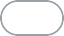
 Rarely
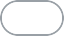
Sometimes
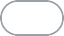
 Often
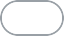
Always

**Do you perform preventive exams, for example mammography, prostate exam , among others?**

*Mark only one oval.*


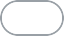
 Never
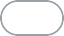
 Rarely
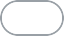
Sometimes
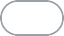
 Often
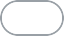
Always

**Do you worry about controlling your blood sugar level?**

*Mark only one oval.*


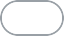
 Never
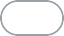
 Rarely
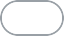
Sometimes
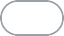
 Often
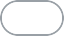
Always

**Do you worry about blood pressure control?**

*Mark only one oval.*


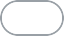
 Never
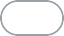
 Rarely
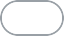
Sometimes
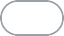
 Often
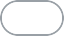
Always

**Do you go to the doctor regularly?**

*Mark only one oval.*


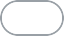
 Never
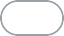
 Rarely
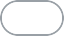
Sometimes
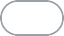
 Often
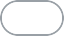
Always

**Section 2: Nutrition**

**Are you looking to adopt a healthier and more nutritious diet?**

*Mark only one oval.*


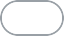
 Never
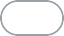
 Rarely
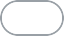
Sometimes
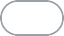
 Often
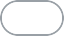
Always

**How often do you consume fresh foods, such as rice, beans, fruits, vegetables, eggs, meat, milk among others?**

*Mark only one oval.*


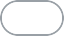
 Never
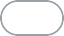
 Rarely
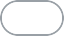
Sometimes
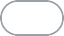
 Often
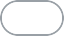
Always

**Do you consume fruits and vegetables every day?**

*Mark only one oval.*


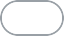
 Never
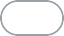
 Rarely
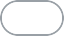
Sometimes
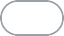
 Often
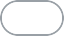
Always

**Do you consider your food healthy?**

*Mark only one oval.*


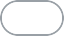
 Never
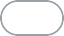
 Rarely
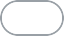
Sometimes
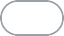
 Often
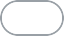
Always

**Section 3: Physical Activity**

**Do you practice physical activity?**

*Mark only one oval.*


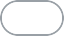
 Never
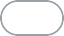
 Rarely
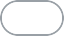
Sometimes
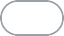
 Often
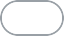
Always

**Do you carry out activities of your daily life that require movement, for example gardening, housework, walking, among others?**

*Mark only one oval.*


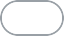
 Never
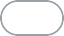
 Rarely
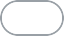
Sometimes
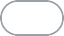
 Often
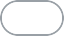
Always

**Do you worry about staying physically active?**

*Mark only one oval.*


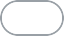
 Never
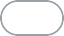
 Rarely
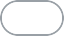
Sometimes Often Always

**Are you in the habit of doing at least 30 min of walking a day?**

*Mark only one oval.*

Never Rarely Sometimes Often Always

**Section 4: Quality of Relationships**

**Do you have a good relationship with your family?**

*Mark only one oval.*

Never Rarely Sometimes Often Always

**Do you feel supported by your friends?**

*Mark only one oval.*

Never Rarely Sometimes Often Always

**Do you have a good relationship with the people you live with on a daily basis?**

*Mark only one oval.*

Never Rarely Sometimes Often Always

**Do you feel loved by your family members?**

*Mark only one oval.*

Never Rarely Sometimes Often Always

**Do you feel like you have people you can trust?**

*Mark only one oval.*

Never Rarely Sometimes Often Always

**Do you have people to talk to?**

*Mark only one oval.*

Never Rarely Sometimes Often Always

**Scoring and Interpretation**

Each item is rated from 1 (Never) to 5 (Always).

**Total score range:** 19–95.

Higher scores indicate a healthier lifestyle

**Reference**

Ferreira LK, Meireles JFF, Gomes GAO, Ferreira MEC. Development and psychometric evaluation of a lifestyle evaluation instrument for older adults. *Percept Mot Skills*. 2023;130(5):1901-1923.

**Mini Nutritional Assessment – Short Form (MNA-SF)**

**1. Has food intake declined over the past 3 months?**

- Severe decrease → 0
- Moderate decrease → 1
- No decrease → 2

**2. Weight loss during the last 3 months**

- Weight loss >3 kg → 0
- Does not know → 1
- Weight loss 1–3 kg → 2
- No weight loss → 3

**3. Mobility**

- Bed or chair bound → 0
- Able to get out of bed/chair but does not go out → 1
- Goes out → 2

**4. Psychological stress or acute disease in past 3 months?**

- Yes → 0
- No → 2

**5. Neuropsychological problems**

- Severe dementia or depression → 0
- Mild dementia → 1
- No psychological problems → 2

**6. BMI or calf circumference**

- BMI <19 / Calf <31 cm → 0
- BMI 19–21 → 1
- BMI 21–23 → 2
- BMI ≥23 / Calf ≥31 cm → 3

**Interpretation of total score (sum of all 6 items, max 14 points):**

- 12–14 → Normal nutritional status
- 8–11 → At risk of malnutrition
- 0–7 → Malnourished

**Reference**

Kaiser MJ, Bauer JM, Ramsch C, Uter W, Guigoz Y, Cederholm T, et al. Validation of the Mini Nutritional Assessment short-form (MNA-SF): a practical tool for identification of nutritional status. J Nutr Health Aging. 2009;13(9):782-788.

**Short-Bout of Physical Activity Questionnaire**

**In the past 7 days, indicate how often you performed short bouts of physical activity lasting 1–5 minutes. Consider each episode, even if brief.**

**Section A — LPA**

**Q1. Slow walking inside or around your home (1–5 minutes)?**

0 days

1–2 days

3–4 days

5–7 days

**Q2. Light household chores (dusting, folding laundry, kitchen work) for 1–5 minutes?**

0 days

1–2 days

3–4 days

5–7 days

**Q3. Standing up or moving briefly to break long sitting (1–3 minutes)?**

0 days

1–2 days

3–4 days

5–7 days

**Section B — MVPA**

**Q4. Brisk walking for 2–5 minutes (slightly increased breathing/heart rate)?**

0 days

1–2 days

3–4 days

5–7 days

**Q5. Stair climbing for 1–3 minutes in one go?**

0 days

1–2 days

3–4 days

5–7 days

**Q6. Carrying a moderately heavy object (e.g., groceries) for 1–3 minutes?**

0 days

1–2 days

3–4 days

5–7 days

**Scoring Instructions**

**Scoring of Short-Bout Physical Activity Questionnaire (SBPAQ)**

Each item was scored on a 4-point ordinal scale based on frequency in the past 7 days:

0 = 0 days

1 = 1–2 days

2 = 3–4 days

3 = 5–7 days

All six items were scored individually using the same system.

The questionnaire consists of two domains:

**Light Physical Activity (LPA):** Q1–Q3

**Moderate-to-Vigorous Physical Activity (MVPA):** Q4–Q6

LPA score was calculated by summing Q1–Q3 (range: 0–9)

MVPA score was calculated by summing Q4–Q6 (range: 0–9)

Total SBPAQ score was obtained by summing all six items (range: 0–18)

Higher scores indicate greater frequency of short-bout physical activity

**Sarcopenia Assessment**

**SARCF**

**Instructions:** For each question, select the option that best describes your difficulty in the past month.

**Strength:** How much difficulty do you have in lifting and carrying 10 pounds (≈4.5 kg)?

*Mark only one oval.*

None - 0

Some - 1

Lot/Unable - 2

**Assistance in Walking:** How much difficulty do you have walking across a room?

*Mark only one oval.*

None - 0

Some - 1

Lot/Unable - 2

**Rising from a Chair:** How much difficulty do you have transferring from a chair or bed?

*Mark only one oval.*

None - 0

Some - 1

Lot/Unable - 2

**Climbing Stairs:** How much difficulty do you have climbing a flight of 10 stairs?

*Mark only one oval.*

None - 0

Some - 1

Lot/Unable - 2

**Falls:** How many times have you fallen in the past year?

*Mark only one oval.*

None - 0

Some - 1

Lot/Unable - 2

**Calf Circumference (CC) Measurement**

Instructions for participants:

Measure the circumference of your dominant calf(the one you use most to kick) at the

**widest part** using a measuring tape.

Keep your **leg relaxed, foot flat on the floor**, and measure while sitting or standing. Record the measurement in **centimeters (cm)**.

**What is the circumference of your dominant calf (in cm)? For Men**

*Mark only one oval.*

≥34 cm → Normal (0)

<34 cm → Low muscle mass / At risk of sarcopenia (1)

**What is the circumference of your dominant calf (in cm)? For Women**

*Mark only one oval.*

≥33 cm → Normal (0)

- <33 cm → Low muscle mass / At risk of sarcopenia (1)

**Scoring & Interpretation:**

**SARC-F Questionnaire**

- Each of the five items was scored as:

0 = No difficulty

1 = Some difficulty

2 = Severe difficulty / Unable

**Total SARC-F score** was obtained by summing all five items. Range: 0–10

**Calf Circumference (CC)**

Scoring was based on sex-specific cut-offs:

**Men:** ≥34 cm = 0 (normal), <34 cm = 10 (low muscle mass)

**Women:** ≥33 cm = 0 (normal), <33 cm = 10 (low muscle mass)

**SARC-CalF Composite Score**

The SARC-CalF score was calculated by combining SARC-F and calf circumference scores:

SARC-F score (0–10)

Calf circumference score (0 or 10)

**Total SARC-CalF score range: 0–20**

Interpretation (based on AWGS recommendation):

**<11 = No sarcopenia risk**

**≥11 = At risk of sarcopenia**

**Short Physical Performance Battery (SPPB)**

**Balance Test**

**Instructions:**Participants were asked to perform three standing positions in a quiet area. Each position was demonstrated before testing. Participants were instructed to stand without support if possible. Performance time was recorded up to a maximum of 10 seconds for each position.

**1. Side-by-side stand (feet together, 10 seconds)**

- Unable to hold for 10 seconds → 0 points
- Able to hold for 10 seconds → 1 points

**2. Semi-tandem stand (heel of one foot beside big toe of the other foot, 10 seconds)**

- Unable or <10 seconds → 0 points
- Able to hold for 10 seconds → 1 points

**3. Tandem stand (heel of one foot directly in front of toes of the other foot, 10 seconds)**

- Unable or <3 seconds → 0 points
- 3–9 seconds → 1 point
- 10 seconds → 2 points

**Administration notes:**Participants progressed to the next position only if they successfully completed the previous stance. If a participant was unable to maintain the semi-tandem position, they were not assessed for the tandem position in accordance with the standardized SPPB protocol.

**Gait Speed Test (4 meters)**

**Instructions:**Participants were instructed to walk a distance of 4 meters at their usual pace. A stopwatch was used to record time. Walking aids were permitted if required.

**Scoring:**

- **Unable to complete → 0 points**
- **≥8.70 seconds → 1 point**
- **6.21–8.69 seconds → 2 points**
- **4.82–6.20 seconds → 3 points**
- **<4.82 seconds → 4 points**

**Chair Stand Test (5 repetitions)**

**Instructions:**Participants sat in a standard chair with arms folded across the chest and were instructed to stand up and sit down five times as quickly as possible without using their arms. Time taken was recorded in seconds.

**Scoring:**

- **Unable to complete → 0 points**
- **≥16.7 seconds → 1 point**
- **13.7–16.6 seconds → 2 points**
- **11.2–13.6 seconds → 3 points**
- **≤11.1 seconds → 4 points**

**Interpretation**

SPPB total scores were categorized as ≤9 indicating poor physical performance and >9 indicating good physical performance for analytical purposes. This categorization was based on geriatric literature demonstrating that SPPB scores below 10 are associated with increased risk of functional decline, disability, and adverse health outcomes in older adults.

**Reference**

**Pavasini R, Guralnik J, Brown JC, et al. Short Physical Performance Battery and all-cause mortality: systematic review and meta-analysis. *BMC Medicine*. 2016; 14:172. doi:10.1186/s12916-016-0763-7**
